# Supplementary material for: Accumulation of Cardiovascular and Diabetes Medication among Apparently Healthy Statin Initiators
Source: PubMed Central journal article supplement (PMC4319777; doi:10.1371/journal.pone.0117182), 2015-02-06
Supplement: pone.0117182.s001.pdf [file pone.0117182.s001.pdf]

**Table S1.** Number of initiations of cardiovascular and diabetes drugs stratified by time since statin initiation among the 4 097 apparently healthy patients initiating statin therapy (a patient can initiate several other drugs)

|                                          | Days since statin initiation |               |             |             |             |               |
|------------------------------------------|------------------------------|---------------|-------------|-------------|-------------|---------------|
|                                          | 0                            | 1–179         | 180–364     | 365–547     | 548–730     | 0–730         |
|                                          | n (%)                        |               |             |             |             |               |
| Diabetes drugs                           | 247 (11.4)                   | 136 (7.8)     | 108 (10.9)  | 130 (13.6)  | 111 (12.0)  | 732 (10.8)    |
| Other antithrombotic agents but warfarin | 127 (5.8)                    | 169 (9.7)     | 107 (10.8)  | 101 (10.6)  | 92 (9.9)    | 596 (8.8)     |
| Warfarin                                 | 34 (1.6)                     | 40 (2.3)      | 33 (3.3)    | 26 (2.7)    | 33 (3.6)    | 166 (2.5)     |
| Cardiac glycosides and antiarrhythmics   | 7 (0.3)                      | 10 (0.6)      | 13 (1.3)    | 6 (0.6)     | 16 (1.7)    | 52 (0.8)      |
| Organic nitrates                         | 277 (12.7)                   | 163 (9.4)     | 89 (9.0)    | 98 (10.3)   | 83 (9.0)    | 710 (10.5)    |
| Centrally acting antihypertensive drugs  | 3 (0.1)                      | 7 (0.4)       | 4 (0.4)     | 2 (0.2)     | 5 (0.5)     | 21 (0.3)      |
| Diuretics                                | 112 (5.2)                    | 129 (7.4)     | 89 (9.0)    | 81 (8.5)    | 81 (8.8)    | 492 (7.3)     |
| Beta blockers                            | 444 (20.4)                   | 374 (21.5)    | 201 (20.4)  | 163 (17.1)  | 186 (20.1)  | 1 368 (20.2)  |
| Selective calcium channel blockers       | 129 (5.9)                    | 130 (7.5)     | 90 (9.1)    | 90 (9.4)    | 94 (10.2)   | 533 (7.9)     |
| ACEI or ARB                              | 794 (36.5)                   | 578 (32.3)    | 253 (25.6)  | 256 (26.9)  | 224 (24.2)  | 2 105 (31.1)  |
| Total                                    | 2 174 (100.0)                | 1 736 (100.0) | 987 (100.0) | 953 (100.0) | 925 (100.0) | 6 775 (100.0) |

Abbreviations: ACEI, angiotensin-converting enzyme inhibitor; ARB, angiotensin receptor blocker
