# Supplementary material for: Accumulation of Cardiovascular and Diabetes Medication among Apparently Healthy Statin Initiators
Source: PubMed Central journal article supplement (PMC4319777; doi:10.1371/journal.pone.0117182), 2015-02-06

**Figure S1.** Representation of a quadratic growth mixture model for 5 panel waves ( $u_i$ = measured count variable).

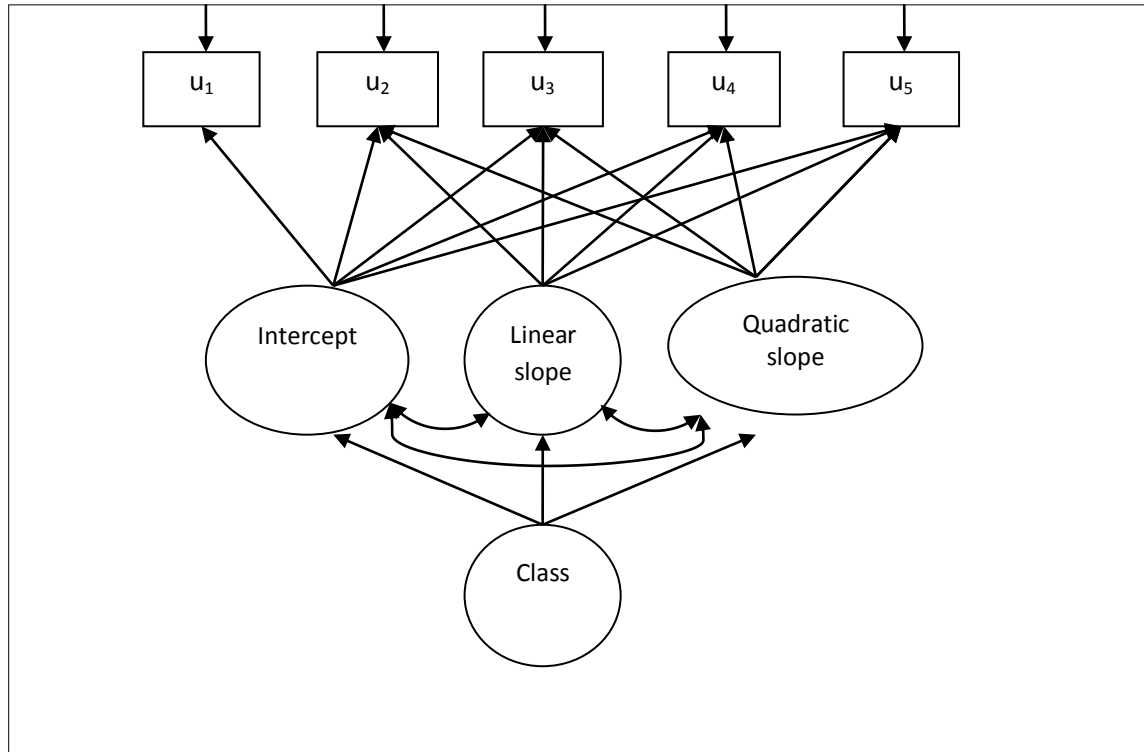

Supplement: pone.0117182.s002.pdf [file pone.0117182.s002.pdf]
